# Supplementary material
Source: PubMed Central journal article supplement (PMC6503959)
Supplement: NIHMS1013867-supplement-Figure_S1_and_Table_S1.pdf [file NIHMS1013867-supplement-Figure_S1_and_Table_S1.pdf]

**Title: A malaria transmission-blocking (+)-usnic acid derivative prevents Plasmodium zygote-to-ookinete maturation in the mosquito midgut**

**Authors:** Rebecca Pastrana-Mena<sup>1¶</sup>, Derrick K. Mathias<sup>1¶,#a</sup>, Michael Delves<sup>2</sup>, Krithika Rajaram<sup>1</sup>, Jonas G. King<sup>1,#b</sup>, Rebecca Yee<sup>1</sup>, Beatrice Trucchi<sup>3</sup>, Luisella Verotta<sup>3</sup>, Rhoel R. Dinglasan<sup>1,\*</sup>

**Affiliations:**

<sup>1</sup>W. Harry Feinstone Department of Molecular Microbiology and Immunology, Malaria Research Institute, Johns Hopkins Bloomberg School of Public Health, Baltimore, MD, USA

<sup>2</sup>Department of Life Sciences, Imperial College of London, London, United Kingdom

<sup>3</sup>Department of Chemistry, University of Milan, Milan, Italy

<sup>#a</sup>Current Address: Department of Entomology & Plant Pathology, Auburn University, Auburn, AL, USA

<sup>#b</sup>Current Address: Department of Biochemistry, Molecular Biology, Entomology and Plant Pathology, Mississippi State University, Mississippi State, MS, USA

<sup>#c</sup>Current Address: Emerging Pathogens Institute, Department of Infectious Diseases & Pathology, The University of Florida, Gainesville, FL, USA

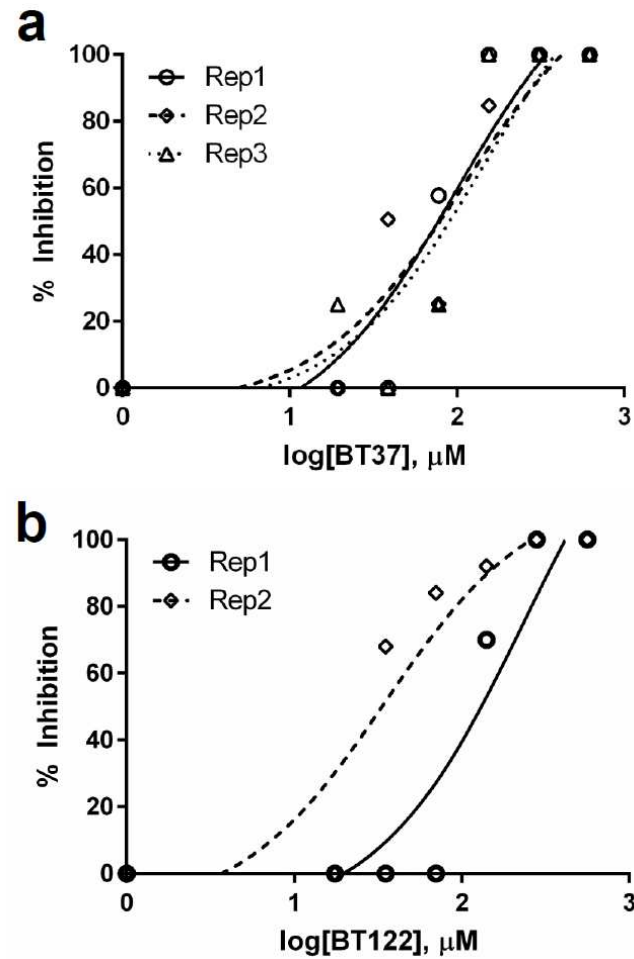

**Figure S1.** The 50% inhibitory concentration (IC<sub>50</sub>) of UA derivatives BT37 and BT122. The IC<sub>50</sub> was determined for (a) BT37 and (b) BT122 using data from the dose-response experiments reported in Figure 2. For each compound the micromolar concentration was log transformed and percent inhibition of oocyst development was calculated as in Figure 1. To determine IC<sub>50</sub> values, a non-linear model was applied to the data as described in the Methods. The IC<sub>50</sub> for BT37 (a) ranged between 97-142  $\mu\text{M}$  and the IC<sub>50</sub> for BT122 (b) ranged between 35-234  $\mu\text{M}$ .

**Supplemental Table S1. Analysis of Cell Viability after incubation with compounds BT-37 and BT-122 for 24 hrs and 48 hrs.**

| Drug  | Time | RAW 264.7                     |                                    |                               |                                    | L6               |                       |                  |                       | HepG2            |                       |                  |                       |
|-------|------|-------------------------------|------------------------------------|-------------------------------|------------------------------------|------------------|-----------------------|------------------|-----------------------|------------------|-----------------------|------------------|-----------------------|
|       |      | LC <sub>50</sub> <sup>a</sup> | LC <sub>50</sub> (CI) <sup>b</sup> | LC <sub>05</sub> <sup>c</sup> | LC <sub>05</sub> (CI) <sup>d</sup> | LC <sub>50</sub> | LC <sub>50</sub> (CI) | LC <sub>05</sub> | LC <sub>05</sub> (CI) | LC <sub>50</sub> | LC <sub>50</sub> (CI) | LC <sub>05</sub> | LC <sub>05</sub> (CI) |
| BT37  | 24 H | 638.2                         | 584.3 - 711.6                      | 107.1                         | 74.7 - 151.5                       | 504.9            | 466.0 - 553.2         | 55.0             | 39.6 - 75.3           | 581.4            | 533.0 - 644.9         | 80.1             | 56.0 - 112.5          |
|       | 48 H | 260.5                         | 233.9 - 292.3                      | 26.9                          | 17.6 - 39.9                        | 204.5            | 187.7 - 223.5         | 22.5             | 16.1 - 30.8           | 286.1            | 260.9 - 313.5         | 33.4             | 23.0 - 47.1           |
| BT122 | 24 H | 731.2                         | 617.9 - 918.1                      | 71.1                          | 36.3 - 133.2                       | 603.1            | 538.5 - 693.1         | 64.7             | 40.8 - 100.0          | 707.6            | 627.7 - 824.2         | 86.3             | 53.5 - 136.1          |
|       | 48 H | 331.4                         | 296.4 - 375.0                      | 35.0                          | 22.0 - 53.5                        | 279.9            | 257.0 - 306.5         | 22.6             | 15.9 - 31.5           | 326              | 302.3 - 353.6         | 27.1             | 19.6 - 36.8           |

<sup>a</sup>LC50 is the concentration of the test compound (µg/ml) at which 50% of the cells are inviable after 24 or 48 hours. The values were estimated by non-linear regression with data from toxicity assays performed as described in the Materials and Methods.

<sup>b</sup>LC50 (CI) is the 95% confidence interval of the LC50 estimated by non-linear regression with data from toxicity assays performed as described in the Materials and Methods.

<sup>c</sup>LC05 is the concentration of the test compound (µg/ml) at which 5% of the cells are inviable after 24 or 48 hours. The values were estimated by non-linear regression with data from toxicity assays performed as described in the Materials and Methods.

<sup>d</sup>LC05 (CI) is the 95% confidence interval of the LC05 estimated by non-linear regression with data from toxicity assays performed as described in the Materials and Methods.
